# Supplementary material for: The Burden of Pediatric Visual Impairment and Ocular Diagnoses in Barbados
Source: MDPI journal article supplement (doi:10.3390/ijerph20166554), 2023-08-10
Supplement: s1 [file s1]

## Supplementary Materials

### Table of Contents

**Table S1.** Ocular diagnoses observed in all children seen in the public sector of Barbados during 2019.

|                                 | Total number of children in study population = 3,278 |
|---------------------------------|------------------------------------------------------|
| Ocular Diagnoses                | Number of children (n)                               |
| Refractive error                | 1496                                                 |
| Allergic eye disease            | 1129                                                 |
| Strabismus                      | 194                                                  |
| Amblyopia                       | 136                                                  |
| Adnexal diseases                |                                                      |
| - Chalazion/hordeolum           | 31                                                   |
| - Ptosis                        | 23                                                   |
| - Nasolacrimal duct obstruction | 2                                                    |
| - Other                         |                                                      |
| o Sebaceous cyst                | 6                                                    |
| o Ectropion                     | 1                                                    |
| o Lid abrasion                  | 1                                                    |
| o Dermatitis                    | 2                                                    |
| o Pyogenic granuloma            | 1                                                    |
| o Preseptal cellulitis          | 1                                                    |
| o Nevus                         | 1                                                    |
| o Hemangioma                    | 1                                                    |
| o Unknown                       | 1                                                    |
| Total                           | 71                                                   |
| Glaucoma-related diseases       |                                                      |
| - Glaucoma suspect              | 31                                                   |
| - Primary Congenital Glaucoma   | 7                                                    |
| - Juvenile Open Angle Glaucoma  | 2                                                    |
| - Peters Anomaly                | 1                                                    |
| - Secondary glaucoma            |                                                      |

|                                               |    |
|-----------------------------------------------|----|
| ○ Post- surgery                               | 2  |
| ○ Post-hyphema                                | 1  |
| ○ Angle recession                             | 1  |
| Total                                         | 45 |
| <b>Non-glaucomatous optic nerve anomalies</b> |    |
| - Physiologic cupping                         | 31 |
| - Optic nerve drusen                          | 2  |
| - Other                                       | 8  |
| Total                                         | 41 |
| <b>Corneal disorders</b>                      |    |
| - Corneal scar                                | 8  |
| - Dry eye disease                             | 8  |
| - Keratoconus                                 | 6  |
| - Corneal abrasion                            | 4  |
| - Other                                       | 1  |
| Total                                         | 27 |
| <b>Ocular trauma</b>                          | 19 |
| <b>Cataract</b>                               |    |
| - Congenital                                  | 9  |
| - Steroid-induced                             | 3  |
| - Traumatic                                   | 1  |
| - Other                                       | 6  |
| Total                                         | 19 |
| <b>Retinal diseases</b>                       |    |
| - Retinopathy of prematurity                  | 2  |
| - Retinitis pigmentosa                        | 2  |
| - Other                                       |    |
| ○ Chorioretinal scar                          | 2  |
| ○ Chorioretinal coloboma                      | 1  |
| ○ Best disease                                | 1  |
| ○ Stargardt disease                           | 1  |
| Total                                         | 9  |
| <b>Uveitis</b>                                |    |
| - Post-trauma                                 | 5  |
| <b>Non- allergic conjunctival disease</b>     |    |

|                                      |    |
|--------------------------------------|----|
|                                      |    |
| - Conjunctival abrasion              | 4  |
| - Subconjunctival hemorrhage         | 2  |
| - Conjunctival nevus                 | 1  |
| - Chemical conjunctivitis            | 1  |
| - Redundant conjunctiva              | 1  |
| - Pterygium                          | 1  |
| Total                                | 10 |
| <b>Orbital disease</b>               |    |
| - Orbital cellulitis                 | 2  |
| <b>Non-organic visual symptoms</b>   | 39 |
| <b>Other</b>                         |    |
| - Congenital idiopathic iris atrophy | 1  |
| - Iris nevus                         | 4  |
| - Iris coloboma                      | 1  |
| - Iris and retina coloboma           | 1  |
| - Nystagmus                          | 1  |
| - Color vision deficiency            | 1  |
| - Ocular migraine                    | 4  |
| - Bell's palsy                       | 2  |
| - Physiologic diplopia               | 1  |
| Total                                | 16 |
| <b>Unknown</b>                       | 5  |
